# Supplementary material for: Microbiota of the distal ileum under antibiotic prophylaxis: Does fecal exposure during intracorporeal intestinal urinary diversion increase gastrointestinal complications?
Source: Research Square preprint supplement (doi:10.21203/rs.3.rs-5363803/v1), 2024-11-12
Supplement: Supplementary file 1 [file 46e63de9c21aec9e1a36158d.pdf]

**Table 1.** Quantification of cultivated colonies

| Growth                                      | Colonies on plate | cfu/mL              |
|---------------------------------------------|-------------------|---------------------|
| <b>Insubstantial growth</b>                 |                   |                     |
| No growth (lower limit of detection) (-)    | No colonies       | $< 1 \times 10^2$   |
| Single colonies/growth from broth ( $\pm$ ) | Under 1/3         | $0.1-1 \times 10^3$ |
| <b>Substantial growth</b>                   |                   |                     |
| Sparse growth (1+)                          | 1/3-2/3           | $0.1-1 \times 10^4$ |
| Moderate growth (2+)                        | Over 2/3          | $1-2 \times 10^4$   |
| Abundant growth (3+)                        | Entire plate      | $> 2 \times 10^4$   |
