# Supplementary material for: Microbiota of the distal ileum under antibiotic prophylaxis: Does fecal exposure during intracorporeal intestinal urinary diversion increase gastrointestinal complications?
Source: Research Square preprint supplement (doi:10.21203/rs.3.rs-5363803/v1), 2024-11-12
Supplement: Supplementary file 2 [file 5068612fdef857d14165088e.pdf]

**Table 3.** Colony quantities in cultured ileal feces and ascites

| Growth                                      | Ileal feces, n (%) | Ascites, n (%) |
|---------------------------------------------|--------------------|----------------|
| <b>Insubstantial growth</b>                 | 114 (87.0)         | 128 (97.7)     |
| No growth (lower limit of detection) (-)    | 47 (35.9)          | 94 (71.8)      |
| Single colonies/growth from broth ( $\pm$ ) | 67 (51.1)          | 34 (25.9)      |
| <b>Substantial growth</b>                   | 17 (13.0)          | 3 (2.3)        |
| Sparse growth (1+)                          | 8 (6.1)            | 1 (0.8)        |
| Moderate growth (2+)                        | 6 (4.6)            | 1 (0.8)        |
| Abundant growth (3+)                        | 3 (2.3)            | 1 (0.8)        |
