# Supplementary material for: Microbiota of the distal ileum under antibiotic prophylaxis: Does fecal exposure during intracorporeal intestinal urinary diversion increase gastrointestinal complications?
Source: Research Square preprint supplement (doi:10.21203/rs.3.rs-5363803/v1), 2024-11-12
Supplement: Supplementary file 3 [file 5b6bd708a14656908dec8762.pdf]

**Table 4.** Positivity of cultured ascites according to the colony quantities in cultured ileal feces

| Growth of Ileal feces                       | Ileal feces, n (%) | Positive ascites, n (%) |
|---------------------------------------------|--------------------|-------------------------|
| No growth (lower limit of detection) (-)    | 47 (35.9)          | 2/47 (4.3)              |
| Single colonies/growth from broth ( $\pm$ ) | 67 (51.1)          | 25/67 (37.3)            |
| Sparse growth (1+)                          | 8 (6.1)            | 5/8 (62.5)              |
| Moderate growth (2+)                        | 6 (4.6)            | 4/6 (66.7)              |
| Abundant growth (3+)                        | 3 (2.3)            | 3/3 (100)               |
