# Supplementary material for: Microbiota of the distal ileum under antibiotic prophylaxis: Does fecal exposure during intracorporeal intestinal urinary diversion increase gastrointestinal complications?
Source: Research Square preprint supplement (doi:10.21203/rs.3.rs-5363803/v1), 2024-11-12
Supplement: Supplementary file 4 [file 7d7903a1841d52da2399e2e1.pdf]

**Table 8.** Logistic regression analysis for positive cultured ascites

| Variable                                  | Univariate          |          | Multivariate        |          |
|-------------------------------------------|---------------------|----------|---------------------|----------|
|                                           | OR (95% CI)         | <i>P</i> | OR (95% CI)         | <i>P</i> |
| Intercept                                 |                     |          | 0.002 (0.001-0.378) | 0.02     |
| Age                                       | 1.090 (1.020-1.160) | 0.005    | 1.050 (0.980-1.120) | 0.18     |
| BMI                                       | 0.901 (0.788-1.030) | 0.13     |                     |          |
| Male gender                               | 2.220 (0.693-7.120) | 0.18     |                     |          |
| ASA                                       | 3.450 (1.500-7.950) | 0.003    | 1.410 (0.514-3.890) | 0.50     |
| Previous abdominal/pelvic surgery         | 0.976 (0.380-2.510) | 0.960    |                     |          |
| Preoperative use of proton pump inhibitor | 2.040 (0.735-5.640) | 0.17     |                     |          |
| Frailty                                   | 6.250 (2.570-15.20) | <0.001   | 3.910 (1.350-11.30) | 0.01     |
| Operative time                            | 0.996 (0.990-1.000) | 0.18     |                     |          |
| Intestinal tract reconstruction time      | 1.000 (0.972-1.030) | 0.91     |                     |          |
| Diversion type (neobladder)               | 0.428 (0.116-1.570) | 0.20     |                     |          |
| EBL                                       | 1.000 (0.998-1.000) | 0.72     |                     |          |
| Intraoperative crystalloid administration | 1.000 (0.999-1.000) | 0.56     |                     |          |
| Blood transfusion                         | 1.300 (0.274-8.300) | 0.76     |                     |          |
| ERAS                                      | 0.762 (0.301-1.930) | 0.56     |                     |          |
| Postoperative Alb                         | 0.457 (0.125-1.670) | 0.23     |                     |          |
| Postoperative CRP                         | 0.987 (0.864-1.130) | 0.84     |                     |          |

OR, odds ratio; CI, confidence interval; BMI, body mass index; ASA, American Society of Anesthesiologists; EBL, estimated blood loss; ERAS, enhanced recovery after surgery; Alb, albumin; CRP, c-reactive protein
