# Supplementary material for: Microbiota of the distal ileum under antibiotic prophylaxis: Does fecal exposure during intracorporeal intestinal urinary diversion increase gastrointestinal complications?
Source: Research Square preprint supplement (doi:10.21203/rs.3.rs-5363803/v1), 2024-11-12
Supplement: Supplementary file 5 [file ca6be4108a55fb109d7794f5.pdf]

**Table 7.** Logistic regression analysis for gastrointestinal complications

| Variable                                  | Univariate          |          | Multivariate        |          |
|-------------------------------------------|---------------------|----------|---------------------|----------|
|                                           | OR (95% CI)         | <i>P</i> | OR (95% CI)         | <i>P</i> |
| Intercept                                 |                     |          | 0.002 (0.001-0.378) | 0.02     |
| Age                                       | 1.080 (1.010-1.160) | 0.03     | 1.020 (0.940-1.110) | 0.59     |
| BMI                                       | 0.899 (0.774-1.040) | 0.16     |                     |          |
| Male gender                               | 0.759 (0.255-2.260) | 0.62     |                     |          |
| ASA                                       | 3.420 (1.820-12.10) | 0.008    | 2.340 (0.987-10.30) | 0.09     |
| Previous abdominal/pelvic surgery         | 2.210 (0.808-6.040) | 0.12     |                     |          |
| Preoperative use of proton pump inhibitor | 1.940 (0.679-5.510) | 0.22     |                     |          |
| pT3 or higher                             | 0.261 (0.055-1.220) | 0.09     |                     |          |
| pN positive                               | 0.581 (0.118-2.870) | 0.51     |                     |          |
| Operative time                            | 0.998 (0.992-1.005) | 0.50     |                     |          |
| Intestinal tract reconstruction time      | 0.997 (0.965-1.030) | 0.87     |                     |          |
| Diversion type (neobladder)               | 0.139 (0.017-1.090) | 0.06     |                     |          |
| EBL                                       | 0.999 (0.997-1.000) | 0.50     |                     |          |
| Intraoperative crystalloid administration | 1.000 (0.999-1.000) | 0.62     |                     |          |
| Blood transfusion                         | 1.400 (0.262-9.100) | 0.67     |                     |          |
| ERAS                                      | 0.637 (0.232-1.750) | 0.38     |                     |          |
| Postoperative Alb                         | 0.277 (0.061-1.260) | 0.10     |                     |          |
| Postoperative CRP                         | 1.170 (0.994-1.370) | 0.05     | 1.120 (0.946-1.330) | 0.18     |
| Positive cultured ileal feces             | 4.820 (1.540-15.10) | 0.006    | 1.480 (0.395-5.520) | 0.56     |
| Positive cultured ascites                 | 7.640 (3.000-19.40) | <0.001   | 4.930 (1.640-14.80) | 0.004    |

OR, odds ratio; CI, confidence interval; BMI, body mass index; ASA, American Society of Anesthesiologists; EBL, estimated blood loss; ERAS, enhanced recovery after surgery; Alb, albumin; CRP, c-reactive protein
