# Supplementary material for: Microbiota of the distal ileum under antibiotic prophylaxis: Does fecal exposure during intracorporeal intestinal urinary diversion increase gastrointestinal complications?
Source: Research Square preprint supplement (doi:10.21203/rs.3.rs-5363803/v1), 2024-11-12
Supplement: Supplementary file 6 [file cd7fd30911a4b4cd97b5c7ca.pdf]

**Table 2.** Baseline and perioperative characteristics

| Characteristics                                             | Number of patients<br>(n = 131) |
|-------------------------------------------------------------|---------------------------------|
| Median age, years (IQR)                                     | 73 (67-77)                      |
| Median BMI, kg/m <sup>2</sup> (IQR)                         | 22.3 (20.6-24.0)                |
| Sex, n (%)                                                  |                                 |
| Male                                                        | 103 (78.6)                      |
| Female                                                      | 28 (21.4)                       |
| ASA, n (%)                                                  |                                 |
| 1                                                           | 51 (38.9)                       |
| 2                                                           | 75 (57.3)                       |
| 3                                                           | 5 (3.8)                         |
| Previous abdominal surgery, n (%)                           | 34 (25.9)                       |
| Frailty, n (%)                                              | 41 (31.3)                       |
| Preoperative use of proton pump inhibitor, n (%)            | 20 (15.3)                       |
| Implementation of ERAS, n (%)                               | 104 (79.4)                      |
| Operative time, median (IQR), min                           | 431 (402-498)                   |
| Intestinal tract reconstruction time, median (IQR), min     | 38 (31-48)                      |
| EBL, median (IQR), mL                                       | 200 (100-300)                   |
| Intraoperative crystalloid administration, median (IQR), mL | 2500 (2200-3000)                |
| Blood transfusion, n (%)                                    | 3 (2.3)                         |
| Diversion type, n (%)                                       |                                 |
| Ileal conduit                                               | 111 (84.7)                      |
| Ileal neobladder                                            | 20 (15.3)                       |
| pT3 or higher, n (%)                                        | 36 (27.5)                       |
| pN positive, n (%)                                          | 17 (13.0)                       |
| Gastrointestinal Complications, n (%)                       | 35 (26.7)                       |
| Postoperative ileus                                         | 31 (23.7)                       |
| Intra-abdominal infections (Peritonitis / abscess)          | 4 (3.0)                         |

IQR, interquartile range; BMI, body mass index; ASA, American Society of Anesthesiologists; ERAS, enhanced recovery after surgery; EBL, estimated blood loss
