# Supplementary material for: Microbiota of the distal ileum under antibiotic prophylaxis: Does fecal exposure during intracorporeal intestinal urinary diversion increase gastrointestinal complications?
Source: Research Square preprint supplement (doi:10.21203/rs.3.rs-5363803/v1), 2024-11-12
Supplement: Supplementary file 7 [file f0ea26af6ea3c657b9ba7487.pdf]

**Table 5.** Association between positive culture and GI complications, and its type of bacteria and fungi

|                                   | Ileal feces, n (%)                |           | Ascites, n (%)                      |           |
|-----------------------------------|-----------------------------------|-----------|-------------------------------------|-----------|
| <b>Positivity of culture</b>      |                                   |           |                                     |           |
| No growth                         | 47/131 (35.9)                     | P value   | 94/131 (71.8)                       | P value   |
| GI complications                  | 4/47 (8.5)                        | P = 0.002 | 11/94 (11.7)                        | P < 0.001 |
| POI                               | 4                                 |           | 11                                  |           |
| IAI                               | 0                                 |           | 0                                   |           |
| Positive culture                  | 84/131 (64.1)                     |           | 37/131 (28.2)                       |           |
| GI complications                  | 31/84 (36.9)                      |           | 24/37 (64.9)                        |           |
| POI                               | 27                                |           | 20                                  |           |
| IAI                               | 4                                 |           | 4                                   |           |
| <b>Type of bacteria and fungi</b> |                                   |           |                                     |           |
| Gram-positive cocci               | <i>Streptococcus</i> 39/84 (46.4) |           | <i>Enterococcus</i> 14/37 (37.8)    |           |
|                                   | <i>Enterococcus</i> 20/84 (23.8)  |           | <i>Staphylococcus</i> 1/37 (2.7)    |           |
|                                   | <i>Staphylococcus</i> 8/84 (9.5)  |           |                                     |           |
|                                   | <i>Rothia</i> 2/84 (2.4)          |           |                                     |           |
|                                   | <i>Lactococcus</i> 1/84 (1.2)     |           |                                     |           |
|                                   | <i>Granulicatella</i> 1/84 (1.2)  |           |                                     |           |
| Gram-positive bacilli             | <i>Lactbacillus</i> 7/84 (8.3)    |           | <i>Corynebacterium</i> 1/37 (2.7)   |           |
|                                   | <i>Corynebacterium</i> 4/84 (4.8) |           | <i>Anaerobic species</i> 1/37 (2.7) |           |
|                                   | <i>Actinomyces</i> 1/84 (1.2)     |           |                                     |           |
| Gram-negative cocci               | <i>Neisseria</i> 1/84 (1.2)       |           | NA                                  |           |
| Gram-negative bacilli             | <i>Enterobacter</i> 19/84 (22.6)  |           | <i>Enterobacter</i> 9/37 (24.3)     |           |
|                                   | <i>Klebsiella</i> 10/84 (11.9)    |           | <i>Escherichia</i> 1/37 (2.7)       |           |
|                                   | <i>Escherichia</i> 6/84 (7.1)     |           | <i>Pseudomonas</i> 1/37 (2.7)       |           |
|                                   | <i>Haemophilus</i> 3/84 (3.6)     |           |                                     |           |
|                                   | <i>Citrobacter</i> 3/84 (3.6)     |           |                                     |           |
|                                   | <i>Raoultella</i> 2/84 (2.4)      |           |                                     |           |
|                                   | <i>Acinetobacter</i> 3/84 (3.6)   |           |                                     |           |
|                                   | <i>Bacteroides</i> 1/84 (1.2)     |           |                                     |           |
|                                   | <i>Hafnia</i> 1/84 (1.2)          |           |                                     |           |
|                                   | <i>Aeromonas</i> 1/84 (1.2)       |           |                                     |           |
| Fungi                             | <i>Candida</i> 9/84 (10.7)        |           | <i>Candida</i> 18/37 (48.6)         |           |

GI, gastrointestinal; POI, postoperative ileus; IAI, intra-abdominal infections
