# Supplementary material for: Microbiota of the distal ileum under antibiotic prophylaxis: Does fecal exposure during intracorporeal intestinal urinary diversion increase gastrointestinal complications?
Source: Research Square preprint supplement (doi:10.21203/rs.3.rs-5363803/v1), 2024-11-12
Supplement: Supplementary file 8 [file f3aa71b788b02a6c06d21cc2.pdf]

**Table 6.** Type of bacteria and fungi in cultured ileal feces and ascites in patients with intra-abdominal infections

| Patient No. | Age | Sex | Medication history                          | Diversion type | Symptoms (POD at diagnosis)  | Type of complication            | Type of bacteria or fungi (ileal feces)                                     | Type of bacteria or fungi (ascites)                                         | Blood culture                       |
|-------------|-----|-----|---------------------------------------------|----------------|------------------------------|---------------------------------|-----------------------------------------------------------------------------|-----------------------------------------------------------------------------|-------------------------------------|
| 1           | 74  | M   | Steroid, anti-rheumatoid, PPI               | Ileal conduit  | Abdominal pain, fever (POD4) | Abscess, ileus, superficial SSI | <i>Enterobacter cloacae</i> (CRE) (3+)<br><i>Enterococcus faecalis</i> (1+) | <i>Enterobacter cloacae</i> (CRE) (±)                                       | negative                            |
| 2           | 66  | M   | Antihypertensive agent, PPI                 | Neobladder     | Abdominal pain (POD9)        | Peritonitis, abscess, ileus     | <i>Enterobacter cloacae</i> (1+)<br><i>Klebsiella pneumoniae</i> (1+)       | <i>Enterobacter cloacae</i> (±)                                             | <i>Enterobacter cloacae</i>         |
| 3           | 78  | M   | Antihypertensive agent, antilipidemic agent | Ileal conduit  | Abdominal pain, fever (POD7) | Peritonitis                     | <i>Enterobacter aerogenes</i> (CRE) (2+)<br><i>γ-streptococcus</i> (±)      | <i>Enterobacter aerogenes</i> (CRE) (±)<br><i>Enterococcus faecalis</i> (±) | <i>Enterobacter aerogenes</i> (CRE) |
| 4           | 77  | M   | Anticoagulant, PPI                          | Ileal conduit  | Fever (POD8)                 | Abscess                         | <i>Lactococcus garvieae</i> (±)<br><i>Klebsiella oxytoca</i> (±)            | <i>Candida glabrata</i> (±)<br><i>Candida albicans</i> (±)                  | <i>Candida glabrata</i>             |

POD, postoperative day; PPI, proton pump inhibitor; SSI, surgical site infection; CRE, carbapenem-resistant Enterobacteriaceae
